# Supplementary material for: Patterns of Change in Dietary Habits and Physical Activity during Lockdown in Spain Due to the COVID-19 Pandemic
Source: PubMed Central journal article supplement (PMC7911477; doi:10.3390/nu13020300), 2021-01-21
Supplement: nutrients-13-00300-s001.pdf [file nutrients-13-00300-s001.pdf]

**Table S1.** - Food groups considered in the food frequency questionnaire and in the questionnaire for self-reported change in consumption.

| Food groups/ subgroups considered in the food frequency questionnaire |                                                                  |
|-----------------------------------------------------------------------|------------------------------------------------------------------|
| 1.                                                                    | Meat (beef)                                                      |
| 2.                                                                    | Meat (pork)                                                      |
| 3.                                                                    | Meat (poultry)                                                   |
| 4.                                                                    | Processed meats                                                  |
| 5.                                                                    | Fish (fresh or frozen)                                           |
| 6.                                                                    | Canned fish                                                      |
| 7.                                                                    | Eggs                                                             |
| 8.                                                                    | Milk                                                             |
| 9.                                                                    | Yoghurt                                                          |
| 10.                                                                   | Cheese                                                           |
| 11.                                                                   | Legumes                                                          |
| 12.                                                                   | Rice, pasta and potatoes                                         |
| 13.                                                                   | Bread                                                            |
| 14.                                                                   | Pizza                                                            |
| 15.                                                                   | Raw vegetables and salad (potatoes excluded)                     |
| 16.                                                                   | Cooked vegetables (potatoes excluded)                            |
| 17.                                                                   | Fresh fruits (juices excluded)                                   |
| 18.                                                                   | Sweet biscuits and bakery products                               |
| 19.                                                                   | Chocolate, chocolate-based products and confectionery            |
| 20.                                                                   | Nuts                                                             |
| 21.                                                                   | Salted snacks                                                    |
| 22.                                                                   | Sugary drinks                                                    |
| 23.                                                                   | Fermented alcoholic drinks (wine, beer, cider)                   |
| 24.                                                                   | Distilled alcoholic beverages (gin, whisky, vodka, brandy, etc.) |

**Table S2.** - Characteristics of clusters of change in physical activity and dietary habits (C) by gender.

| Variables    |             | All                  |                      |                   |          | Men                  |                      |                   |          | Women                |                      |                   |          |
|--------------|-------------|----------------------|----------------------|-------------------|----------|----------------------|----------------------|-------------------|----------|----------------------|----------------------|-------------------|----------|
|              |             | C1<br>Less<br>active | C2<br>More<br>active | C3<br>As<br>usual | <i>p</i> | C1<br>Less<br>active | C2<br>More<br>active | C3<br>As<br>usual | <i>p</i> | C1<br>Less<br>active | C2<br>More<br>active | C3<br>As<br>usual | <i>p</i> |
| Gender       | Men         | 31.8%                | 16.6%                | 51.6%             | <0.001   |                      |                      |                   |          |                      |                      |                   |          |
|              | Women       | 28.5%                | 37.4%                | 34.0%             |          |                      |                      |                   |          |                      |                      |                   |          |
| Age groups   | 18-34 years |                      |                      |                   | <0.001   |                      |                      |                   | 0.052    |                      |                      |                   | <0.001   |
|              | 35-54 years | 20.6%                | 47.7%                | 31.7%             |          | 28.1%                | 28.1%                | 43.9%             |          | 18.7%                | 52.6%                | 28.7%             |          |
|              | <55 years   | 34.9%                | 30.1%                | 34.9%             |          | 38.1%                | 15.5%                | 46.4%             |          | 34.0%                | 34.7%                | 31.3%             |          |
|              | ≥55 years   | 31.4%                | 19.6%                | 49.0%             |          | 29.7%                | 12.8%                | 57.4%             |          | 32.4%                | 24.3%                | 43.3%             |          |
| Cohabitation | Alone       | 43.6%                |                      |                   | 0.003    |                      |                      |                   | ns       |                      |                      |                   | 0.002    |
|              | Family      | 26.7%                | 21.3%                | 35.1%             |          | 40.0%                | 16.7%                | 43.3%             |          | 45.3%                | 23.4%                | 31.3%             |          |
|              | Partner     | 31.0%                | 35.6%                | 37.6%             |          | 32.9%                | 16.5%                | 50.6%             |          | 24.4%                | 42.7%                | 32.9%             |          |
|              | Relative    | 31.0%                | 25.3%                | 43.7%             |          | 27.4%                | 16.7%                | 56.0%             |          | 32.9%                | 29.8%                | 37.3%             |          |
|              | s, friends, | 29.0%                | 29.0%                | 41.9%             |          | 29.4%                | 17.6%                | 52.9%             |          | 28.9%                | 33.3%                | 37.8%             |          |

|                                     |                            |       |       |       |        |       |       |       |        |       |       |       |        |
|-------------------------------------|----------------------------|-------|-------|-------|--------|-------|-------|-------|--------|-------|-------|-------|--------|
|                                     | other people               |       |       |       |        |       |       |       |        |       |       |       |        |
| Size of locality                    | <5,000 inh.                |       |       |       |        |       |       |       |        |       |       |       |        |
|                                     | 5,000-19,999 inh.          | 25.9% | 27.0% | 47.0% |        | 28.1% | 10.5% | 61.4% |        | 25.0% | 34.4% | 40.6% |        |
|                                     | 20,000-99,999 inh.         | 37.5% | 27.9% | 34.6% |        | 48.3% | 3.4%  | 48.3% | ns     | 34.6% | 34.6% | 30.8% | ns     |
|                                     | 100,000-299,999 inh.       | 29.8% | 37.5% | 32.7% | ns     | 31.0% | 20.7% | 48.3% |        | 29.1% | 46.4% | 24.5% |        |
|                                     | ≥300,000 inh.              | 29.6% | 31.1% | 39.3% |        | 33.3% | 21.1% | 45.6% |        | 28.1% | 35.3% | 36.7% |        |
| Smoker                              | Yes                        | 28.4% | 28.4% | 43.2% | ns     | 27.8% | 5.6%  | 66.7% | ns     | 28.6% | 35.7% | 35.7% | ns     |
| Smoking in confinement              | More                       | 31.3% | 37.5% | 31.3% | ns     | 62.5% | 0.0%  | 37.5% | ns     | 25.0% | 45.0% | 30.0% | ns     |
| Supplements in confinement          | Yes                        | 33.3% | 25.2% | 41.4% | ns     | 32.7% | 18.4% | 49.0% | ns     | 33.5% | 27.3% | 39.1% | 0.011  |
| Exposure to sunlight in confinement | Exposure ≥10min ≤1day/week | 35.2% | 29.9% | 34.9% | 0.02   | 38.0% | 20.0% | 42.0% | ns     | 33.9% | 34.4% | 31.7% | ns     |
| Sleep in confinement                | Poor quality               | 30.7% | 32.3% | 37.0% | <0.001 | 40.6% | 15.9% | 43.5% | <0.001 | 28.0% | 36.8% | 35.2% | 0.018  |
| Sedentary behavior in confinement   | >8h/day                    | 29.8% | 36.5% | 33.7% | 0.020  | 29.8% | 17.5% | 52.6% | ns     | 29.7% | 42.1% | 28.2% | 0.026  |
| Usual moderate PA                   | 30min sessions ≥2days/week | 36.2% | 25.5% | 38.3% | <0.001 | 36.8% | 14.5% | 48.7% | <0.001 | 35.9% | 30.3% | 33.8% | <0.001 |
| Moderate PA in confinement          | 30min sessions ≥2days/week | 17.6% | 41.1% | 41.3% | <0.001 | 22.0% | 22.5% | 55.5% | <0.001 | 15.9% | 48.6% | 35.5% | <0.001 |
| Quality of usual diet               | Q1                         | 23.1% | 36.7% | 40.3% | 0.021  | 21.6% | 20.5% | 58.0% | ns     | 23.6% | 43.2% | 33.2% | ns     |

C: cluster of change in physical activity and dietary habits. PA: physical activity. Q1: first quartile of usual diet quality score; inh: inhabitants.  $\chi^2$  test.
